# Supplementary material for: Preparation and characterization of Ti supported bimodal mesoporous catalysts using a self-assembly route combined with a ship-in-a-bottle method
Source: Royal Society of Chemistry journal article supplement (doi:10.1039/c3nj01078c), 2014-01-01
Supplement: c3nj01078c1.pdf [file c3nj01078c1.pdf]

**Electronic Supplementary Information**

*For*

**NJC**

**Preparation and characterization of Ti supported bimodal mesoporous catalysts**

**using a self-assembly route combined with a ship-in-a-bottle method**

Shiyang Bai, Xintao Hu, Jihong Sun\*, Bo Ren

**Figure S1. FT-IR spectra of Ti supported ILBMMs.**

**Figure S2. Diffusion reflectance UV–vis spectra Ti supported ILBMMs.**

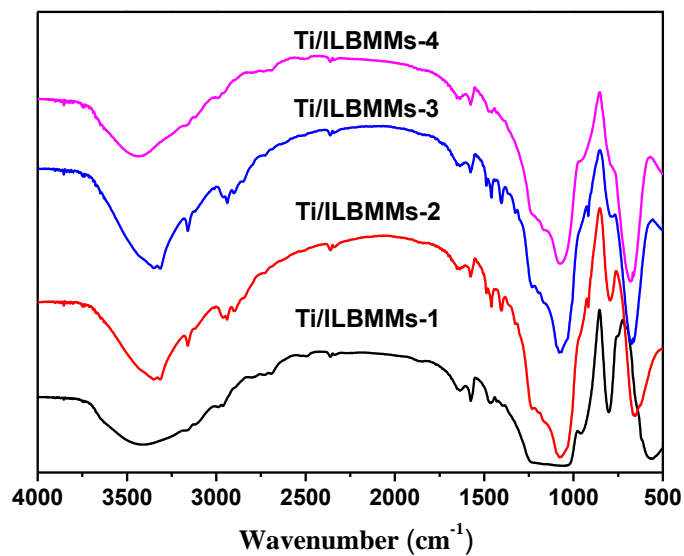

Figure S1. FT-IR spectra of Ti supported ILBMMs.

As seen in Figure S1, FT-IR spectra of all samples reveal almost same feature as that of ILBMMs, in other words, the bands at  $2950\text{ cm}^{-1}$ ,  $2842\text{ cm}^{-1}$ ,  $1573\text{ cm}^{-1}$ ,  $1458\text{ cm}^{-1}$ ,  $1184\text{ cm}^{-1}$ , and  $810\text{ cm}^{-1}$  are corresponding to the characteristic absorptions of IL, besides, others at  $1085\text{ cm}^{-1}$ ,  $960\text{ cm}^{-1}$  and  $815\text{ cm}^{-1}$  belong to the vibration peaks of the mesoporous framework (Si-O-Si). Notably, the band at  $960\text{ cm}^{-1}$  also can be ascribed to the symmetrical stretching vibrations of Si-O-Ti, although this observation cannot be used as the direct evidence of the introduction of Ti.

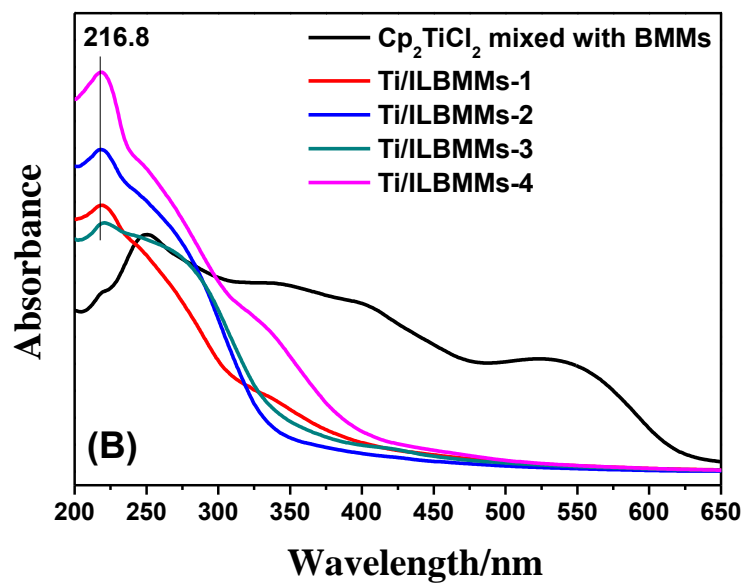

Figure S2. Diffusion reflectance UV-vis spectra Ti supported ILBMMs.

Figure S2 presents the Uv-vis spectra of Ti/ILBMMs samples. As a reference, the Uv-vis spectrum of mixture of  $\text{Cp}_2\text{TiCl}_2$  with BMMs exhibits a broad adsorption bands, in which the adsorption peaks are centered at  $\lambda=250$  nm, 420 nm and 550 nm. As compared, the Uv-vis spectra of Ti/ILBMMs samples illustrate that the band at  $\lambda=216.8$  nm is attributed to imidazole ring of IL. These observations obviously indicate a strong interaction between IL and  $\text{Cp}_2\text{TiCl}_2$ .
